# Supplementary material for: Prenatal Tobacco Exposure Modulated the Association of Genetic variants with Diagnosed ADHD and its symptom domain in children: A Community Based Case–Control Study
Source: PubMed Central journal article supplement (PMC6414688; doi:10.1038/s41598-019-40850-w), 2019-03-12
Supplement: 41598_2019_40850_MOESM1_ESM.pdf [file 41598_2019_40850_MOESM1_ESM.pdf]

Title page

Prenatal Tobacco Exposure Modulated the Association of Genetic variants with  
Diagnosed ADHD and its symptom domain in children: A Community Based Case–  
Control Study

Authors: Yanni Wang<sup>1</sup>, Dan Hu<sup>2</sup>, Wenjing Chen<sup>1</sup>, Hongli Xue<sup>3</sup>, Yukai Du<sup>1\*</sup>

**Author Affiliations:**

<sup>1</sup>Department of Maternal and Child Health, School of Public Health, Tongji Medical College,  
Huazhong University of Science and Technology, Wuhan, Hubei, P.R. China.

<sup>2</sup>Department of Child Health Care, Hospital of Maternal and Child Health of Dalian, Dalian,  
Liaoning, P.R. China.

<sup>3</sup> Department of Maternal, Child and Adolescent Health, School of Public Health, Lanzhou  
University, Lanzhou, Gansu, P.R. China.

## Supplementary

Table S1 Association between individual SNP and ADHD risk

| Model                           | genotype | Controls, N(%) | ADHD, N(%) | OR (95% CI)*           | P*           | P <sup>FDR</sup> |
|---------------------------------|----------|----------------|------------|------------------------|--------------|------------------|
| <i>SLC6A3</i> rs1042129 (N=398) |          |                |            |                        |              |                  |
| Codominant                      | GG       | 173 (74.6)     | 118 (71.1) | 1.00                   | 0.509        | 0.735            |
|                                 | AG       | 55 (23.7)      | 43 (25.9)  | 1.15 (0.72-1.82)       |              |                  |
|                                 | AA       | 4 (1.7)        | 5 (3.0)    | 1.83 (0.48-6.97)       |              |                  |
| Dominant                        | GG       | 173 (74.6)     | 118 (71.1) | 1.00                   | 0.353        |                  |
|                                 | AG/AA    | 59 (25.4)      | 48 (28.9)  | 1.19 (0.76-1.87)       |              |                  |
| Recessive                       | GG/AG    | 228 (98.3)     | 161 (97.0) | 1.00                   | 0.371        |                  |
|                                 | AA       | 4 (1.7)        | 5 (3.0)    | 1.86 (0.48-7.17)       |              |                  |
| Additive                        | ---      | ---            | ---        | 1.21 (0.81-1.79)       | 0.269        | 0.499            |
| <i>SLC6A3</i> rs2550948(N=393)  |          |                |            |                        |              |                  |
| Codominant                      | GG       | 169 (74.1)     | 117 (70.9) | 1.00                   | 0.781        | 0.846            |
|                                 | AG       | 52 (22.8)      | 42 (25.4)  | 1.17 (0.72-1.89)       |              |                  |
|                                 | AA       | 7 (3.1)        | 6 (3.6)    | 1.24 (0.40-3.84)       |              |                  |
| Dominant                        | GG       | 169 (74.1)     | 117 (70.9) | 1.00                   | 0.481        |                  |
|                                 | AG/AA    | 59 (25.9)      | 48 (29.1)  | 1.18 (0.75-1.86)       |              |                  |
| Recessive                       | GG/AG    | 221 (96.9)     | 159 (96.4) | 1.00                   | 0.762        |                  |
|                                 | AA       | 7 (3.1)        | 6 (3.6)    | 1.19 (0.39-3.68)       |              |                  |
| Additive                        | ---      | ---            | ---        | 1.15 (0.78-1.68)       | 0.491        | 0.580            |
| <i>SLC6A3</i> rs3756450(N=393)  |          |                |            |                        |              |                  |
| Codominant                      | TT       | 79 (34.6)      | 70 (42.4)  | 1.00                   | 0.294        | 0.637            |
|                                 | CT       | 107 (46.9)     | 68 (41.2)  | 0.71 (0.45-1.11)       |              |                  |
|                                 | CC       | 42 (18.4)      | 27 (16.4)  | 0.73 (0.40-1.31)       |              |                  |
| Dominant                        | TT       | 79 (34.6)      | 70 (42.4)  | 1.00                   | 0.123        |                  |
|                                 | CT/CC    | 149 (65.3)     | 95 (57.6)  | 0.72 (0.47-1.09)       |              |                  |
| Recessive                       | TT-CT    | 186 (81.6)     | 138 (83.6) | 1.00                   | 0.621        |                  |
|                                 | CT       | 107 (46.9)     | 68 (41.2)  | 0.78 (0.52-1.18)       |              |                  |
| Additive                        | ---      | ---            | ---        | 0.82 (0.62-1.10)       | 0.181        | 0.392            |
| <i>ADRA2A</i> rs2484516(N=398)  |          |                |            |                        |              |                  |
| Codominant                      | CC       | 196 (84.1)     | 150 (89.3) | 1.00                   | 0.351        | 0.652            |
|                                 | CG       | 35 (15.0)      | 17 (10.1)  | 0.64 (0.34-1.19)       |              |                  |
|                                 | GG       | 2 (0.9)        | 1 (0.6)    | 0.77 (0.07-8.71)       |              |                  |
| Dominant                        | CC       | 196 (84.1)     | 150 (89.3) | 1.00                   | 0.152        |                  |
|                                 | CG/GG    | 37 (15.9)      | 18 (10.7)  | 0.64 (0.35-1.19)       |              |                  |
| Recessive                       | CC/CG    | 231 (99.1)     | 167 (99.4) | 1.00                   | 0.863        |                  |
|                                 | GG       | 2 (0.9)        | 1 (0.6)    | 0.81 (0.07-9.19)       |              |                  |
| Additive                        | ---      | ---            | ---        | 0.68 (0.38-1.20)       | 0.170        | 0.442            |
| <i>ADRA2A</i> rs553668(N=385)   |          |                |            |                        |              |                  |
| Codominant                      | AA       | 84 (37.3)      | 40 (25.0)  | 1.00                   | <b>0.038</b> | 0.247            |
|                                 | AG       | 115 (51.1)     | 93 (58.1)  | <b>1.69(1.06-2.71)</b> |              |                  |

|                                 |       |            |            |                         |              |       |
|---------------------------------|-------|------------|------------|-------------------------|--------------|-------|
|                                 | GG    | 26 (11.7)  | 27 (16.9)  | <b>2.07 (1.05-4.06)</b> |              |       |
| Dominant                        | AA    | 84 (37.3)  | 40 (25.0)  | 1.00                    | 0.013        |       |
|                                 | AG/GG | 141 (62.8) | 120 (75.0) | 1.76(1.12-2.77)         |              |       |
| Recessive                       | AA/AG | 199 (88.4) | 133 (83.1) | 1.00                    | 0.140        |       |
|                                 | GG    | 26 (11.7)  | 27 (16.9)  | 1.47(0.87-2.67)         |              |       |
| Additive                        | ---   | ---        | ---        | <b>1.49(1.08-2.06)</b>  | <b>0.014</b> | 0.182 |
| <i>ADRA2A</i> rs1800544 (N=383) |       |            |            |                         |              |       |
| Codominant                      | CC    | 54 (24.0)  | 36 (22.6)  | 1.00                    | 0.373        | 0.629 |
|                                 | CG    | 113 (50.2) | 92 (57.9)  | 1.16 (0.67-1.89)        |              |       |
|                                 | GG    | 58 (25.8)  | 31 (19.5)  | 0.74 (0.43-1.48)        |              |       |
| Dominant                        | AA    | 54 (24.0)  | 36 (22.6)  | 1.00                    | 0.914        |       |
|                                 | AG/GG | 171 (76.0) | 123 (77.4) | 1.03 (0.68-1.61)        |              |       |
| Recessive                       | AA/AG | 167 (74.2) | 128 (80.5) | 1.00                    | 0.170        |       |
|                                 | GG    | 58 (25.8)  | 31 (19.5)  | 0.76 (0.49-1.19)        |              |       |
| Additive                        | ---   | ---        | ---        | 0.85 (0.76-1.23)        | 0.459        | 0.648 |
| <i>ADRA2A</i> rs2484516 (N=384) |       |            |            |                         |              |       |
| Codominant                      | CC    | 158 (70.5) | 118 (73.8) | 1                       | 0.592        | 0.590 |
|                                 | CG    | 62 (27.6)  | 38 (23.7)  | 0.92 (0.57-1.43)        |              |       |
|                                 | GG    | 4 (1.8)    | 4 (2.5)    | 1.49 (0.31-5.11)        |              |       |
| Dominant                        | CC    | 158 (70.5) | 118 (73.8) | 1                       | 0.510        |       |
|                                 | CG/GG | 66 (29.5)  | 42 (26.2)  | 0.89 (0.54-1.35)        |              |       |
| Recessive                       | CC/CG | 220(98.2)  | 156(97.6)  | 1                       | 0.490        |       |
|                                 | GG    | 4 (1.8)    | 4 (2.5)    | 1.43 (0.42-4.98)        |              |       |
| Additive                        | ---   | ---        | ---        | 1.64 (0.28-9.54)        | 0.598        | 0.742 |
| <i>ADRA2A</i> rs521674 (N=395)  |       |            |            |                         |              |       |
| Codominant                      | TT    | 122 (53.3) | 89 (53.6)  | 1.00                    | 0.096        | 0.450 |
|                                 | AT    | 94 (41)    | 65 (39.2)  | 1.78 (0.95-3.01)        |              |       |
|                                 | AA    | 13 (5.7)   | 12 (7.2)   | 1.31 (0.55-3.31)        |              |       |
| Dominant                        | TT    | 122 (53.3) | 89 (53.6)  | 1.00                    | 0.510        |       |
|                                 | AT/AA | 107(46.7)  | 77(46.4)   | 1.35(0.92-1.98)         |              |       |
| Recessive                       | TT/AT | 216(94.3)  | 154(92.8)  | 1                       | 0.592        |       |
|                                 | AA    | 13 (5.7)   | 12 (7.2)   | 1.48 (0.36-6.11)        |              |       |
| Additive                        | ---   | ---        | ---        | 1.02(0.89-2.20)         | 0.109        | 0.356 |
| <i>DRD2</i> rs1124491(N=385)    |       |            |            |                         |              |       |
| Codominant                      | GG    | 76 (34.2)  | 59 (36.2)  | 1.00                    | 0.071        | 0.309 |
|                                 | AG    | 113 (50.9) | 92 (56.4)  | 1.02(0.65-1.61)         |              |       |
|                                 | AA    | 33 (14.9)  | 12 (7.4)   | 0.46(0.22-0.98)         |              |       |
| Dominant                        | GG    | 76 (34.2)  | 59 (36.2)  | 1.00                    | 0.610        |       |
|                                 | AG/AA | 146 (65.8) | 104 (63.8) | 0.89(0.58-1.38)         |              |       |
| Recessive                       | GG/AG | 189 (85.1) | 151 (92.6) | 1.00                    | <b>0.022</b> |       |
|                                 | AA    | 33 (14.9)  | 12 (7.4)   | <b>0.45(0.23-0.92)</b>  |              |       |
| Additive                        | ---   | ---        | ---        | 0.78(0.56-1.08)         | 0.130        | 0.426 |
| <i>ANKK1</i> rs1800497(N=390)   |       |            |            |                         |              |       |
| Codominant                      | GG    | 81 (36.0)  | 55 (33.3)  | 1.00                    | 0.141        | 0.489 |

|                               |        |            |            |                  |       |       |
|-------------------------------|--------|------------|------------|------------------|-------|-------|
|                               | AG     | 112 (49.8) | 96 (58.2)  | 1.26 (0.80-1.98) |       |       |
|                               | AA     | 32 (14.2)  | 14 (8.5)   | 0.66 (0.32-1.35) |       |       |
| Dominant                      | GG     | 81 (36.0)  | 55 (33.3)  | 1.00             | 0.599 |       |
|                               | AG/AA  | 144 (64.0) | 110 (66.7) | 1.12 (0.73-1.74) |       |       |
| Recessive                     | GG/AG  | 193 (85.8) | 151 (91.5) | 1.00             | 0.091 |       |
|                               | AA     | 32 (14.2)  | 14 (8.5)   | 0.57 (0.29-1.11) |       |       |
| Additive                      | ---    | ---        | ---        | 0.93 (0.67-1.28) | 0.642 | 0.795 |
| <i>DRD4</i> rs916457(N=321)   |        |            |            |                  |       |       |
| Codominant                    | CC     | 138 (80.7) | 123 (82.0) | 1.00             | 0.910 | 0.910 |
|                               | CT     | 30 (17.5)  | 25 (16.7)  | 0.93 (0.51-1.68) |       |       |
|                               | TT     | 3 (1.8)    | 2 (1.3)    | 0.69 (0.11-4.53) |       |       |
| Dominant                      | CC     | 138 (80.7) | 123 (82.0) | 1.00             | 0.741 |       |
|                               | CT/TT  | 33 (19.3)  | 27 (18.0)  | 0.91 (0.51-1.62) |       |       |
| Recessive                     | CC/CT  | 168 (98.2) | 148 (98.7) | 1.00             | 0.741 |       |
|                               | TT     | 3 (1.8)    | 2 (1.3)    | 0.70 (0.11-4.58) |       |       |
| Additive                      | ---    | ---        | ---        | 0.90 (0.54-1.51) | 0.692 | 0.692 |
| <i>DRD4</i> rs747302 (N=382)  |        |            |            |                  |       |       |
| Codominant                    | CC     | 94 (42.7)  | 68 (41.9)  | 1.00             | 0.611 | 0.656 |
|                               | CG     | 105 (47.7) | 84 (51.9)  | 1.10 (0.73-1.68) |       |       |
|                               | GG     | 21 (9.6)   | 10 (6.2)   | 0.77 (0.38-1.66) |       |       |
| Dominant                      | CC     | 94 (42.7)  | 68 (41.9)  | 1.00             | 0.866 |       |
|                               | CG/GG  | 126 (57.3) | 95 (58.1)  | 1.06 (0.66-1.69) |       |       |
| Recessive                     | CC/CG  | 199 (90.5) | 152 (93.8) | 1.00             | 0.363 |       |
|                               | GG     | 21 (9.6)   | 10 (6.2)   | 0.71 (0.38-1.58) |       |       |
| Additive                      | ---    | ---        | ---        | 0.97 (0.64-1.37) | 0.790 | 0.950 |
| <i>DRD4</i> rs1800955 (N=381) |        |            |            |                  |       |       |
| Codominant                    | TT     | 88 (41.1)  | 57 (34.1)  | 1                |       |       |
|                               | CT     | 108 (50.5) | 92 (55.1)  | 1.84 (0.96-3.21) | 0.089 | 0.347 |
|                               | CC     | 18 (8.4)   | 18 (10.8)  | 1.63 (0.75-2.21) |       |       |
| Dominant                      | TT     | 88 (41.1)  | 57 (34.1)  | 1                |       |       |
|                               | CT -CC | 126 (58.9) | 110 (65.9) | 1.34 (0.88-2.05) | 0.203 |       |
| Recessive                     | CC/CT  | 196(91.6)  | 149(89.2)  | 1                |       |       |
|                               | TT     | 18 (8.4)   | 18 (10.8)  | 1.44 (0.54-2.67) | 0.402 |       |
| Additive                      | ---    | ---        | ---        | 1.66 (0.96-2.89) | 0.349 | 0.689 |
| <i>DRD4</i> rs3758653 (N=396) |        |            |            |                  |       |       |
| Codominant                    | TT     | 123 (54.0) | 86 (51.2)  | 1                | 0.803 | 0.982 |
|                               | CT     | 91 (40.0)  | 74 (44.0)  | 1.21 (0.83-1.81) |       |       |
|                               | CC     | 14 (6.0)   | 8 (4.8)    | 0.91(0.65-1.26)  |       |       |
| Dominant                      | TT     | 123 (54.0) | 86 (51.2)  | 1                |       |       |
|                               | CT/CC  | 105 (46.0) | 82 (48.8)  | 1.05 (0.70-1.58) | 0.801 |       |
| Recessive                     | TT/CT  | 214(94.0)  | 160(95.2)  | 1                |       |       |
|                               | CC     | 14 (6.0)   | 8 (4.8)    | 0.89(0.87-1.81)  |       |       |
| Additive                      | ---    | ---        | ---        | 1.06 (0.77-1.48) | 0.785 | 0.895 |
| <i>SLC6A4</i> rs6354(N=397)   |        |            |            |                  |       |       |

|                                 |         |            |             |                  |              |              |
|---------------------------------|---------|------------|-------------|------------------|--------------|--------------|
| Codominant                      | TT      | 186 (80.9) | 118 (70.7)  | 1.00             | <b>0.001</b> | <b>0.019</b> |
|                                 | GT      | 39 (17.0)  | 49 (29.3)   | 1.97(1.21-3.21)  |              |              |
|                                 | GG      | 5 (2.2)    | 0 (0.0)     | ---              |              |              |
| Dominant                        | TT      | 186 (80.9) | 118 (70.7)  | 1.00             | 0.025        |              |
|                                 | GT/GG   | 44 (19.1)  | 49 (29.3)   | 1.73(1.07-2.78)  |              |              |
| Recessive                       | TT/GT   | 225 (97.8) | 167 (100.0) |                  | <b>0.013</b> |              |
|                                 | GG      | 5 (2.2)    | 0 (0.0)     | ---              |              |              |
| Additive                        | ---     | ---        | ---         | 1.42(0.92-2.21)  | 0.120        | 0.349        |
| <i>SNAP25</i> rs362986(N=398)   |         |            |             |                  |              |              |
| Codominant                      | T/T     | 197 (85.3) | 147 (88.0)  | 1.00             | 0.720        | 0.859        |
|                                 | C/T     | 31 (13.4)  | 19 (11.4)   | 0.87 (0.47-1.62) |              |              |
|                                 | C/C     | 3 (1.3)    | 1 (0.6)     | 0.47 (0.05-4.60) |              |              |
| Dominant                        | T/T     | 197 (85.3) | 147 (88)    | 1.00             | 0.551        |              |
|                                 | C/T-C/C | 34 (14.7)  | 20 (12)     | 0.83 (0.46-1.52) |              |              |
| Recessive                       | T/T-C/T | 228 (98.7) | 166 (99.4)  | 1.00             | 0.501        |              |
|                                 | C/C     | 3 (1.3)    | 1 (0.6)     | 0.48 (0.05-4.66) |              |              |
| Additive                        | ---     | ---        | ---         | 0.82 (0.48-1.42) | 0.481        | 0.625        |
| <i>SNAP25</i> rs362986(N=395)   |         |            |             |                  |              |              |
| Codominant                      | A/A     | 129 (56.1) | 98 (59.4)   | 1.00             | 0.562        | 0.738        |
|                                 | C/A     | 90 (39.1)  | 62 (37.6)   | 0.92 (0.60-1.40) |              |              |
|                                 | C/C     | 11 (4.8)   | 5 (3.0)     | 0.56 (0.19-1.68) |              |              |
| Dominant                        | A/A     | 129 (56.1) | 98 (59.4)   | 1.00             | 0.531        |              |
|                                 | C/A-C/C | 101 (43.9) | 67 (40.6)   | 0.88 (0.58-1.32) |              |              |
| Recessive                       | A/A-C/A | 219 (95.2) | 160 (97)    | 1.00             | 0.311        |              |
|                                 | C/C     | 11 (4.8)   | 5 (3.0)     | 0.58 (0.19-1.72) |              |              |
| Additive                        | ---     | ---        | ---         | 0.85 (0.60-1.22) | 0.381        | 0.679        |
| <i>SNAP25</i> rs3746544(N=391)  |         |            |             |                  |              |              |
| Codominant                      | T/T     | 138 (60.5) | 102 (62.6)  | 1.00             | 0.478        | 0.779        |
|                                 | G/T     | 79 (34.6)  | 57 (35.0)   | 0.96 (0.62-1.48) |              |              |
|                                 | G/G     | 11 (4.8)   | 4 (2.5)     | 0.50 (0.15-1.62) |              |              |
| Dominant                        | T/T     | 138 (60.5) | 102 (62.6)  | 1.00             | 0.631        |              |
|                                 | G/T-G/G | 90 (39.5)  | 61 (37.4)   | 0.90 (0.59-1.37) |              |              |
| Recessive                       | T/T-G/T | 217 (95.2) | 159 (97.5)  | 1.00             | 0.232        |              |
|                                 | G/G     | 11 (4.8)   | 4 (2.5)     | 0.50 (0.16-1.63) |              |              |
| Additive                        | ---     | ---        | ---         | 0.86 (0.60-1.24) | 0.423        | 0.645        |
| <i>SNAP25</i> rs6077690 (N=392) |         |            |             |                  |              |              |
| Codominant                      | A/A     | 68 (29.8)  | 42 (25.6)   | 1.00             | 0.262        | 0.681        |
|                                 | A/T     | 123 (54.0) | 87 (53.0)   | 1.21 (0.74-1.95) |              |              |
|                                 | T/T     | 37 (16.2)  | 35 (21.3)   | 1.67 (0.91-3.08) |              |              |
| Dominant                        | A/A     | 68 (29.8)  | 42 (25.6)   | 1.00             | 0.252        |              |
|                                 | A/T-T/T | 160 (70.2) | 122 (74.4)  | 1.31 (0.83-2.08) |              |              |
| Recessive                       | A/A-A/T | 191 (83.8) | 129 (78.7)  | 1.00             | 0.142        |              |
|                                 | T/T     | 37 (16.2)  | 35 (21.3)   | 1.48 (0.88-2.49) |              |              |
| Additive                        | ---     | ---        | ---         | 1.28 (0.95-1.74) | 0.111        | 0.721        |

\*: The ORs and 95% CIs were calculated by univariate logistic regression analysis controlling for age and gender, under assumption that variant alleles were risk alleles

$P^{FDR}$ : The  $P$ -values were adjusted by False Discovery Rate (Benjamini–Hochberg method) for multiple tests within the logistic regression analysis

Table S2 The association between *ADRA2A* gene(rs553668) and child ADHD and symptom domains

| Prenatal smoking exposure        | SNP   | Cases(N) | Controls(N) | OR(95%CI)*        | $P$ -value* |
|----------------------------------|-------|----------|-------------|-------------------|-------------|
| <b>All ADHD</b>                  |       |          |             |                   |             |
| No exposure                      | AA    | 26       | 61          | 1                 |             |
| Yes exposure                     | AA    | 14       | 23          | 1.36(0.58-3.22)   | 0.485       |
| No exposure                      | AG+GG | 76       | 115         | 1.65(0.93-2.90)   | 0.084       |
| Yes exposure                     | AG+GG | 44       | 26          | 3.54(1.73-7.25)   | 0.001       |
| <b>Inattention</b>               |       |          |             |                   |             |
| No exposure                      | AA    | 23       | 61          | 1                 |             |
| Yes exposure                     | AA    | 12       | 23          | 1.25 (0.51-3.05)  | 0.628       |
| No exposure                      | AG+GG | 71       | 115         | 1.68(0.94-3.01)   | 0.082       |
| Yes exposure                     | AG+GG | 41       | 26          | 3.53(1.70-7.37)   | 0.001       |
| <b>Hyperactivity/impulsivity</b> |       |          |             |                   |             |
| No exposure                      | AA    | 15       | 61          | 1                 |             |
| Yes exposure                     | AA    | 8        | 23          | 1.63 (0.56-4.710) | 0.369       |
| No exposure                      | AG+GG | 33       | 115         | 1.29 (0.62-2.69)  | 0.490       |
| Yes exposure                     | AG+GG | 25       | 26          | 4.17 (1.71-10.17) | 0.002       |
| <b>ODD</b>                       |       |          |             |                   |             |
| No exposure                      | AA    | 7        | 60          | 1                 |             |
| Yes exposure                     | AA    | 4        | 23          | 1.82 (0.43-7.67)  | 0.417       |
| No exposure                      | AG+GG | 14       | 113         | 1.34 (0.48-3.73)  | 0.580       |
| Yes exposure                     | AG+GG | 14       | 25          | 5.05 (1.58-16.14) | 0.006       |

\*: The ORs and 95% CIs were adjusted by paternal and maternal educational level, pregnancy age of mother, family history of nervous system diseases, low birth weight, preterm birth, blood lead and postnatal tobacco smoke exposure.

Table S3 The association between *DRD2* gene(rs1124491) and child ADHD and symptom domains

| Prenatal smoking exposure        | SNP   | Cases(N) | Controls(N) | OR(95%CI)*        | P-value* |
|----------------------------------|-------|----------|-------------|-------------------|----------|
| <b>All ADHD</b>                  |       |          |             |                   |          |
| No exposure                      | AA    | 7        | 27          | 1                 |          |
| Yes exposure                     | AA    | 99       | 145         | 5.34(1.64-24.46)  | 0.031    |
| No exposure                      | AG+GG | 6        | 6           | 3.99(1.46-10.89)  | 0.007    |
| Yes exposure                     | AG+GG | 52       | 44          | 6.04(2.07-17.65)  | 0.001    |
| <b>Inattention</b>               |       |          |             |                   |          |
| No exposure                      | AA    | 6        | 27          | 1                 |          |
| Yes exposure                     | AA    | 90       | 145         | 5.16 (1.13-23.62) | 0.034    |
| No exposure                      | AG+GG | 6        | 6           | 3.70 (1.35-10.12) | 0.011    |
| Yes exposure                     | AG+GG | 47       | 44          | 5.34(1.82-15.66)  | 0.002    |
| <b>Hyperactivity/impulsivity</b> |       |          |             |                   |          |
| No exposure                      | AA    | 4        | 27          | 1                 |          |
| Yes exposure                     | AA    | 47       | 145         | 4.93(0.89-27.50)  | 0.069    |
| No exposure                      | AG+GG | 4        | 6           | 2.23(0.73-6.85)   | 0.159    |
| Yes exposure                     | AG+GG | 30       | 44          | 4.91(1.46-16.50)  | 0.010    |
| <b>ODD</b>                       |       |          |             |                   |          |
| No exposure                      | AA    | 1        | 27          | 1                 |          |
| Yes exposure                     | AA    | 19       | 145         | 9.87(1.58-49.74)  | 0.021    |
| No exposure                      | AG+GG | 3        | 6           | 4.23(0.53-33.71)  | 0.173    |
| Yes exposure                     | AG+GG | 16       | 44          | 10.58(1.26-49.23) | 0.030    |

\*: The ORs and 95% CIs were adjusted by paternal and maternal educational level, pregnancy age of mother, family history of nervous system diseases, low birth weight, preterm birth, blood lead and postnatal tobacco smoke exposure.

Table S4 The association between *SLC6A4* gene(rs6354) and child ADHD and symptom domains

| Prenatal smoking exposure | SNP   | Cases(N) | Controls(N) | OR(95%CI)*       | P-value* |
|---------------------------|-------|----------|-------------|------------------|----------|
| All ADHD                  |       |          |             |                  |          |
| No exposure               | TT    | 74       | 147         | 1                |          |
| Yes exposure              | TT    | 44       | 39          | 2.13(1.20-3.78)  | 0.010    |
| No exposure               | TG+GG | 34       | 32          | 1.97(1.10-3.52)  | 0.022    |
| Yes exposure              | TG+GG | 15       | 12          | 1.79(0.75-4.28)  | 0.190    |
| Inattention               |       |          |             |                  |          |
| No exposure               | TT    | 69       | 147         | 1                |          |
| Yes exposure              | TT    | 42       | 39          | 2.01(1.19-3.57)  | 0.011    |
| No exposure               | TG+GG | 30       | 32          | 1.92(1.06-3.49)  | 0.032    |
| Yes exposure              | TG+GG | 12       | 12          | 2.13(0.97-4.98)  | 0.081    |
| Hyperactivity/impulsivity |       |          |             |                  |          |
| No exposure               | TT    | 36       | 147         | 1                |          |
| Yes exposure              | TT    | 24       | 39          | 2.70(1.29-5.65)  | 0.008    |
| No exposure               | TG+GG | 16       | 32          | 2.03(0.97-4.25)  | 0.060    |
| Yes exposure              | TG+GG | 10       | 12          | 2.92(1.10-7.75)  | 0.031    |
| ODD                       |       |          |             |                  |          |
| No exposure               | TT    | 13       | 147         |                  |          |
| Yes exposure              | TT    | 13       | 39          | 3.69(1.39-9.78)  | 0.009    |
| No exposure               | TG+GG | 8        | 32          | 2.84(1.04-7.76)  | 0.042    |
| Yes exposure              | TG+GG | 6        | 12          | 4.41(1.32-14.78) | 0.016    |

\*: The ORs and 95% CIs were adjusted by paternal and maternal educational level, pregnancy age of mother, family history of nervous system diseases, low birth weight, preterm birth, blood lead and postnatal tobacco smoke exposure.
